1 *Using vocational education to provide development solutions in the*

2 *Pacific: An emphasis on climate change and health*

3 • **Climate and health**

4

5 Peni Hausia Havea<sup>¶1\*</sup>, Amelia Siga<sup>¶2</sup>, Titilia Rabuatoka<sup>¶2</sup>, Apenisa Tagivetaua Tamani<sup>¶3</sup>, Priya

6 Devi<sup>¶4</sup>, Ruci Senikula<sup>¶2</sup>, Sarah L Hemstock<sup>¶5</sup>, Helene Jacot Des Combes<sup>¶1</sup>

7

8

9

10 <sup>1</sup> Pacific Center for Environment and Sustainable Development (PaCE-SD), University of the  
11 South Pacific, Suva, Fiji

12  
13 <sup>2</sup> EU-PacTVET, GeoScience, Energy & Maritime Division (GEMD), Pacific Community, SPC -  
14 Private Mail Bag, Suva, Fiji

15  
16 <sup>3</sup> Deutsche Gesellschaft für Internationale Zusammenarbeit (GIZ) GmbH, Suva, Fiji

17  
18 <sup>4</sup> Chief Executive Office, Statham Campus, Pacific TAFE, The University of the South Pacific

19  
20 <sup>5</sup> School of Humanities, Bishop Grosseteste University, Lincoln, UK

21

22

23 \*Corresponding author

24 E-mail: [ilaisiaimoana@yahoo.com](mailto:ilaisiaimoana@yahoo.com) (PHH)

25 <sup>¶</sup>These authors contributed equally to this work.

26

27

28

## 29 **Abstract**

30 This article reports on the results of the EU PacTVET project, which explored the use of  
31 Technical Vocational Education and Training (TVET) to provide a better understanding on the  
32 development solution for the impact of climate change on human health in the region. It  
33 describes the findings of a 2014-2018 project on the use of vocational education to provide  
34 development solutions in the Pacific with an emphasis on climate change and health. An  
35 exploratory design was used to investigate how vocational education developed solutions for  
36 climate change and health in the 15 Pacific – African Caribbean and Pacific (P-ACP) countries:  
37 Cook Islands, Federated States of Micronesia (FSM), Fiji, Kiribati, Nauru, Niue, Palau, Papua  
38 New Guinea (PNG), Republic of Marshall Islands (RMI), Samoa, Solomon Islands, Timor-Leste,  
39 Tonga, Tuvalu and Vanuatu. Information collected via personal communication with relevant  
40 stakeholders, qualitative interviews, documents review, and survey (n=48) of youths and young  
41 women in Fiji. Data analysis was performed using thematic analytical strategy and frequency  
42 analysis. The study found that vocational education plays a significant role in building the  
43 capacity of people to become more sustainable and resilient in their life now and in the future.  
44 Also, getting an accredited qualification on health resilience and/or job in the health sector may  
45 help them to respond effectively and efficiently in the event of climate change and/or disasters  
46 caused by natural hazards. The same factors were explored quantitatively using descriptive  
47 analytical strategy, and concluded TVET education, to have a positive influence on climate  
48 change and health. As a result, vocational education could provide development solutions for  
49 health adaptation in the Pacific. These results indicate global actions for vocational education,  
50 that would perfect the course of resilience for these 15 P-ACP in the Pacific and alike in the U.S.

51  
52

## 53 **Introduction**

54 Global climate change and disasters caused by natural hazards are known to affect many  
55 sectors worldwide including the Pacific [1-11]. In the Pacific, these sectors may include but not  
56 limited to agriculture, coastal management, energy and infrastructure, education, fishery, forestry,  
57 health, tourism, and water resources [11-22]. As a result of these phenomenal impacts on all  
58 levels of society for the people of the Pacific, all Pacific governments, Non-Government  
59 Organisations (NGOs), regional and international organisations were then mandated to respond  
60 to the regional countries, in order to enhance their sustainable development solutions to build  
61 more resilient Pacific Islanders, by 2030 and beyond.

62

63           Such a confluent for actions is significant to the livelihoods, health and well-being of the  
64 people in the region, leaders in the Pacific then envisioned the birth of the EU PacTVET project  
65 in August 2014 with an overall budget of EUR 6.1 million, as part of its worldwide contribution  
66 to adapting to climate change (CCA) and hazards (DRR) and Sustainable Energy (SE)  
67 development in the region. The program was specifically designed to enhance sustainable  
68 livelihoods, thus strengthening countries' capabilities to adapt to the adverse effects of climate  
69 change as well as enhancing their energy security at all levels in 15 Pacific Island Countries  
70 (PICs): Cook Islands, Federated States of Micronesia (FSM), Fiji, Kiribati, Nauru, Niue, Palau,  
71 Papua New Guinea (PNG), Republic of the Marshall Islands (RMI), Samoa, Solomon Islands,  
72 Timor-Leste, Tonga, Tuvalu and Vanuatu (Fig 1).

73  
74  
75  
76  
77  
78  
79  
80  
81  
82  
83  
84  
85  
86  
87  
88  
89

Map created by Peni Hausia Havea (QGIS, 2018)

90 **Fig 1. Map of the 15 Pacific Island Countries who are participated in the EU PacTVET**  
91 **Project.**

92 Source Authors  
93  
94

95           The 10th European Development Fund European Union Pacific Technical and Vocational  
96 Education and Training on Sustainable Energy and Climate Change Adaptation (European Union

97 PacTVET) project is component three within the broader regional Adapting to Climate Change  
98 and Sustainable Energy (ACSE) programme. Both the EU and GIZ are EU PacTVET project  
99 implementing partners. The project builds on the recognition that energy security and climate  
100 change are major issues that are currently hindering the social, environmental and economic  
101 development of Pacific – African Caribbean and Pacific (P-ACP) countries [23]. It is also the  
102 first programme in the region to combine both resilience (CCA & DRR) and sustainable energy  
103 in a single project.

104

105 In the Pacific, to date only the World Health Organisation [14, 24] and the Government  
106 of Fiji through the Ministry of Health and Medical Services [25] have had programmes  
107 emphasising climate change and health. The WHO report on “Human Health and Climate  
108 Change in Pacific Island Countries” in 2015 focused on 13 PICs: Cook Islands, FSM, Fiji,  
109 Kiribati, RMI, Nauru, Niue, Palau, Samoa, Solomon Islands, Tonga, Tuvalu, Vanuatu. The  
110 assessment was on vulnerabilities to the impacts of climate change on health and adaptation  
111 strategies. Since Fiji was part of the WHO project in 2016, this led to the Government of Fiji  
112 developing “Climate Change and Health Strategic Action Plan 2016-2020” for the Climate  
113 Change Unit of the Ministry of Health and Medical Services (MoHMS). The other PICs are still  
114 in the process of developing, their own national health adaptation plans. For example, The Queen  
115 Salote Institute of Nursing and Allied Health in Tonga and the School of Nursing in Fiji are  
116 planning to integrate climate change and health into their curriculum in the future.

117

118 Since most of the climate change and health programmes are only available at the  
119 graduate level (e.g. master and Ph.D. etc.) at universities like the University of the South Pacific

120 (USP) and Fiji National University (FNU), the deficiency of literature on this topic indicates that  
121 it is currently under-researched. At the outset of the EU PacTVET project, there were no formal  
122 vocational qualifications in this area, with ten of the fifteen countries the project is working in  
123 having no functional national vocational educational quality assurance systems [26].  
124 Significantly, the EU PacTVET project embarked not only to develop solutions for climate  
125 change and health via vocational education by developing accredited qualifications on Health  
126 and Resilience (CCA & DRR) from certificate level 1 to certificate level 4, it is also working  
127 with the Educational Quality Assessment Programme of the Pacific Community on regional  
128 accreditation on institutional verification so that the qualifications can, in theory, be delivered at  
129 any TVET institution in the region.

130

131 According to the Pacific Association of Technical and Vocational Education and  
132 Training (PATVET) [27], 12 countries have vocational institutions: Cook Islands, Fiji, Kiribati,  
133 Nauru, Niue, PNG, RMI, Samoa, Solomon Islands, Tonga, Tuvalu and Vanuatu – and most of  
134 these countries are USP members countries, where they also host the Pacific Technical And  
135 Further Education (TAFE) course on Resilience programme in their regional campuses.  
136 Additionally, since Fiji has more than 100 vocational schools/institutions and PNG more than  
137 130, using the EU PacTVET project as a guide via its 15 PICs, it is expected that the vocational  
138 education in these countries, as well as USP, could regionalize and/or revolutionise the  
139 development solutions for climate change and health in the Pacific, especially at the grassroots  
140 level such as primary, secondary and TVET education. The by-product of this initiative is that it  
141 may not only help to fill in this gap in knowledge and needs for research in the region, but also

142 help to build Pacific Island communities that are more sustainable and resilient now and in the  
143 future.

144 This may lead not only to perfect the course of climate change and health adaptation but  
145 also contribute to the achievement of the Sustainable Development Goals (SDGs), which has  
146 health as goal number 3 [28], the targets and objectives of the United Nations Framework  
147 Convention on Climate Change (UNFCCC), Sendai Framework for Disaster Risk Reduction  
148 2015-2030 and Framework for Resilient Development in the Pacific, by 2030 and beyond.

149

## 150 **Methods**

### 151 **Methodology**

152 A mixed method approach, named explanatory design [29], was used to gather all the  
153 quantitative aspects of the EU PacTVET project. This quantitative data was collected from the  
154 15 Pacific – African Caribbean and Pacific (P-ACP) countries in the region where the project  
155 was implemented. The quantitative data for the project was mainly from surveys, registration of  
156 students in TVET institutions and health expenditure. The qualitative aspect of the project was  
157 mainly information that was collected from personal communications, interviews and project  
158 documents. The study approach was called explanatory [30] because this paper has relied heavily  
159 on the quantitative aspect of the project.

160

### 161 **Data Analytical Strategy**

162 The data analysis used an explanatory design model [31]. For the quantitative data, the  
163 analysis used frequency. The results of this analysis were then explored qualitatively using  
164 thematic analytical strategy. As a result, the quantitative results were explored qualitatively and

165 vice versa in order to provide a better understanding of how to use TVET education to develop  
166 solutions for health and climate change. The data analysis was performed using SPSS and r  
167 studio.

## 168 **Results**

169 Based on the results of this project, the study found four development solutions that  
170 TVET education has used to help people in the Pacific improve their capacity to address and to  
171 prevent some of the worst impacts of climate change on health and ultimately their well-being.

172

### 173 **1) Using the TVET Education Model to Address Development Solution on Climate** 174 **Change and Health**

175 From studies across the 15 P-ACP countries, a key barrier to the development of the first  
176 qualification on resilience and health is because of no formal vocational sector qualifications in  
177 CCA-DRR (Resilience) prior to the existence of the EU PacTVET project. This has led to the  
178 development of the EU PacTVET model to address this limitation. This has been done by  
179 integrating health and climate change into certificate levels 1-4 for TVET education in resilience.

180

181 Using the EU PacTVET project's state-of-the-art ideology, a climate change landscaping  
182 model has factored health into this conceptual framework. This state-of-the-art idea was used to  
183 develop a framework on climate change and health for the 15 participating countries, that not  
184 only enhance the development solutions of their people in their respective countries but equip  
185 them to achieve sustainable and resilient health and happy well-being now and in the future (Fig  
186 2).

187

188  
189  
190  
191  
192  
193  
194  
195  
196  
197  
198  
199  
200  
201  
202  
203  
204  
205  
206  
207  
208  
209  
210  
211  
212  
213



214  
215 **Fig 2. EU PacTEVT Model for Accredited Qualification on Certificate Level 1-4 on**  
216 **Resilience and Health.**

217  
218 Source Authors

219  
220 In this model, there were four main steps: 1) identification of climate change landscaping  
221 (development solution – climate change and health); 2) climate change regime; 3) qualification  
222 on resilience in health; 4) and achievement of healthy living, sustainable and resilient Pacific  
223 Islanders (adaptation space), by 2030 and beyond.

224  
225 1) Landscaping Climate Change and Health into Certificate Levels 1 to 4 in TVET Education

226 In this context, landscaping climate change and health may mean using the insight of  
227 landscape dynamics to unfold challenges that are difficult to embrace empirically by formalizing  
228 qualifications in the forms of accreditation and quality control for climate change and health in  
229 certificate levels 1 to 4. As a result, it is the science of studying to better understand the  
230 relationship between climate change and health, thus developing a solution that may contribute  
231 to solving health problems in Pacific communities. This landscaping of climate change and  
232 health for the region may represent the EU PacTVET project, since, it is the project, that  
233 developed these qualifications to be recognized nationally and regionally by the national and  
234 regional qualifications frameworks that are already in place.

235  
236 2) Climate Change Regime

237 When the process of landscaping the qualification for climate change and health was  
238 completed by the project, the next phase was to input it into the climate change regime. For the

239 purpose of this project, this was inputted in the form of niche or in the form of innovation to  
240 endogenous factors such as the development of the curriculum for certificate levels 1 to 4 on  
241 climate change and health and exogenous factors, such as the recruitment of a qualified course  
242 coordinator to coordinate and facilitate this programme. In this project, the regime may represent  
243 an organisation or TVET institution.

244

### 245 3) Climate Change and Health Qualification

246 Within the TVET institution or an organisation, the next phase of the model is the  
247 delivery of the qualifications to the learners or to the participants as an output based on the  
248 regime. These institutions are verified by regional accreditation agencies such as Education  
249 Quality & Assessment Programme (EQAP) and/or Fiji Higher Education Commission (FHEC)  
250 to deliver accredited-based qualifications. These accredited qualifications on climate change and  
251 health are available for delivery by the 15 P-ACP countries that were part of this project. Some  
252 of the countries started with this delivery in 2017. The qualifications were accredited because  
253 they met the Pacific Qualification Framework (PQF) standards as well as international standards  
254 like the Australian Qualification Framework (AQF) on certificate levels 1 to 4. Nationalization  
255 of qualifications for primary and secondary education or certificate levels 1 and 2 on health and  
256 climate change is significant because it reveals much more of an individual level of competency  
257 to pursue and advance sustainability and resilience in life and/or the development solutions to  
258 their own problems than just their academic prowess.

259

### 260 4) Adaptation Space

261           When the above-mentioned steps were completed, the final step is the outcome of  
262 delivering these qualifications. The outcome here is that the participants who represent the  
263 adaptation space will then be able to contribute, to providing solutions to their problems, be it at  
264 the community level, church, work environment or at the national level. Health resilience and  
265 adaptation space represents any solutions that people, who successfully completed the  
266 qualification(s) developed by the project, may have or use to protect themselves and others from  
267 the negative effects of climate change and hazards and then use their competency to shape their  
268 roles in climate and health adaptation for the benefits of all people in the Pacific.

269

270           Space may mean an adaptation space has been created for people in the Pacific to adapt  
271 to the effects of climate change in variable ways, to live a healthy life, thus achieving a resilient  
272 Pacific community by 2030 and beyond. Adaptation space may include time, space, money,  
273 being innovative and efficient in how they adapt inter alia, in order to achieve their goal in life.  
274 In summary, this is how the EU PacTVET project addresses the development solution for  
275 climate change and health in the form of formalizing the qualification for certificate levels 1-4 in  
276 resilience and health. For example, by the end of the training on resilience certificate level 4 at  
277 the USP Pacific TAFE, the learner will be competent to work as a:

- 278                   -       Climate Change Officer;
- 279                   -       Community Liaison;
- 280                   -       Project Officer;
- 281                   -       National Disaster Management Officer;
- 282                   -       Climate Change Planning & Development Officer;

283 amongst others, thus contributing to improving the adaptation space in the region. Adaptation  
284 space is the last phase of this climate change landscaping model because the adaptation is open  
285 to all to pursue the best option available to them.

286

287

288 **2) Helping Pacific Countries to Incorporate Health and Climate Change in all Subjects**  
289 **in the Primary and Secondary Education Curriculum**

290 The EU PacTVET project has been partnering with FHEC as one of its pilot areas for  
291 delivering the qualifications. EU PacTVET relied on the FHEC policies and procedures to  
292 initially develop and accredit the Regional Qualifications in Resilience (CCA and DRR). The  
293 project has also contributed to the enhancements of the primary and secondary education systems  
294 in the region in that some of the countries are planning to integrate climate change in all subjects  
295 for their primary and secondary education curriculum. For EU PacTVET, this has been achieved  
296 by partnering with GIZs Coping with Climate Change in the Pacific Islands Region (CCCPIR)  
297 project. If this initiative is successfully implemented, the Pacific region will be the first region in  
298 the world to streamline and/or teach climate change across all subjects at the primary and  
299 secondary levels.

300

301 For example, in Fiji, the Ministry of Education is planning to streamline climate change  
302 in all subjects in primary and secondary education including industrial arts, home economics,  
303 agricultural science, office technology, computer education (Fiji's Ministry of Education 2018,  
304 personal communication, 21 March) accounting, social sciences, sciences, health study,  
305 mathematics, inter alia (A Tamani 2018, personal communication, 8 March). It is expected, by

306 nationalizing and incorporating climate change and health into the school curriculum, it may help  
307 to build capacity on climate resilience and adaptation on health for the 15 P-ACP countries, thus  
308 guaranteeing a Pacific community that will be more resilient and sustainable by 2030 and beyond.  
309 In doing so, coding (to assign a code (numeric value or theme) for classification and/or  
310 identification of something (e.g. converting a message or text) in resilience in climate change  
311 should also be integrated into the school curriculum. Coding is important because it closes the  
312 gap between climate change and Information and Technology (IT).

313

### 314 **3) Using TVET Education to Address Gender Towards Better Health and Resilience**

315 The project also addressed gender equality – for women, girls and vulnerable groups (e.g.  
316 people with disability, etc.) – with the aim of developing a solution to improve skills for  
317 resilience and sustainable energy using TVET. From what is known in this project, although  
318 male learners dominated the TVET sector, the proportion of female learners is increasing for  
319 activities directly using the same learning medium to improve their well-being and to have a  
320 sustainable and resilient life now, and in the future (Fig 3).

321

322

323

324

325

326

327

328

329

330

331

332

333 **Fig 3. Number of students enrolled in TVET institution for 5 countries from years 7-13**

334

335

336

337 For example, a study by the project on 48 youths from communities in Fiji has shown  
338 that these young people chose climate change and health as their study priority if such a course  
339 or programme were to be offered in their schools or TVET institutions (Fig 4).

340

341

342

343

344

345

346

347

348

349

350

351

352 **Fig 4. Percentage of youths and young women who preferred to study climate change and**  
353 **health, Fiji.**

354

355 Although the project has allocated funding to address the needs of women, girls and  
356 vulnerable groups to recognize their rights to education and equal opportunity to climate  
357 resilience and adaptation on health, the Pacific community needs to highlight gender rights in its  
358 human rights convention, in order to widen the Pacific democratic space and work towards

359 achieving SDG goal 5 on gender equality [32-35]. As a result, it will give not only respect for  
360 human rights – to perform unwittingly – but also a right to TVET education, to contribute  
361 significantly to gender equality, in achieving better health and resilience for the people of the  
362 Pacific.

363

364 **4) By Helping Pacific People to Improve their Health Adaptation Strategies in their**  
365 **Communities – to Restore Better Health and Well-being**

366 By giving formal education on climate change and health to the participating countries, it  
367 is expected that this will help the people of the Pacific to improve their health adaptation  
368 strategies in their communities to restore better health and well-being. This can be done in two  
369 ways. First, is to work together with the PATVET members countries since there are at least 12  
370 PICs in this programme. They can do this through their Curriculum Development Units, which  
371 are mandated under the Ministry of Education – to improve basic knowledge and understanding  
372 for children and young people. Second, is to leverage the level of awareness for the general  
373 population. This can be done by integrating climate change and hazards into the census for these  
374 PATVET members countries. These are very important assets for the people of the Pacific.

375

376 People who will be learning climate change and health at TVET institution to become  
377 climate change officers, community liaison officers, project officers, national disaster  
378 management advisors and/or climate change planning and development officers, will most likely  
379 be more competent to live a sustainable and resilient life than those with an ad hoc adaptation  
380 skill. This can be applied to those who have participated in any projects regarding climate change  
381 impacts and adaptation strategies to coastal communities, since people will tend to have better

382 solutions, and know how to deal with their problems better than those who do not learn about  
383 impacts of climate change on health and health resilience and adaptation [12, 13, 23, 36-40].

384

385 As one of the participants from 'Ahau in Tongatapu, Tonga indicated when he was asked  
386 to reflect as to what extent a better understanding of the impact of climate change on livelihoods,  
387 health and well-being helps him as an individual, to prevent the risk of running into the same  
388 problems now and in the future stated: "This is a very important question. There was another  
389 important question, that pops up in the survey about recommending a policy proposal to  
390 prioritize a national survey about the impact of climate change on livelihoods, health and well-  
391 being in Tonga. To me personally, I think that is very important because we need to pass on this  
392 knowledge and learn how to deal with these problems like our elders. That's how we are going to  
393 minimise these problems. So, that's how I am going to help the next generations to come. Most  
394 importantly, this project really gives me some sort of insights into how to look after my families  
395 as well as my friends. As we speak earlier in our discussion today, we have been faced with this  
396 problem for so many years, regarding our homes and in this village. But for me, it gives a lot of  
397 better understanding how to deal with this problem better for now and in the future."

398

## 399 **Discussion**

### 400 **Training programme to focus on training experts in health adaptation**

401 From what is known in the Pacific region, no TVET institution has used their educational  
402 programme to develop solutions for climate change and health. But this is an important solution  
403 for the landscaping of climate change because vocational education can train people to become  
404 experts in health resilience (CCA & DRR) at a lower level and their exposure to this level of



405 training at a young age, will help them to build a resilient Pacific community. This is reiterated  
406 by the FRDP which identifies training and education, among other forms of human resources  
407 development, as vital to developing resilient communities whose members can actively engage  
408 in risk reduction activities and protect the interests of their most vulnerable population [41].

409

410 More importantly, this is the hallmark of building resilience in the Pacific – to empower  
411 those to whom resilience matters, as Paul Farmer called it the pathology of power [42]. It is poor  
412 and disempowered in the society, those who do not work, lack education and the inputs and  
413 systems of support to protect themselves from the negative impacts of climate change and  
414 hazards on their health in the region.

415

416 Seeing climate change and hazards in terms of frequency such as too many people were  
417 affected in the Pacific is too limited an approach to the problems. There is also a need to look at  
418 the social and economic conditions, cultural practices, religion and system of learning where  
419 people can be trained on resilience to reach where they live and work or to safeguard living  
420 “within their comfort zone”. To achieve this, training people on resilience in health through  
421 vocational education should not only welcome all people at all levels of society but with a  
422 purpose to determine the climate change determinant of health and to support the scaling up of  
423 health security.

424

425 This intervention will break the health impacts cycle by empowering people’s solution to  
426 adaptation and improving the footprint of sustainable living of those who will most likely be  
427 affected in the sense of changing the reality when the impacts or when the problems are

428 happening. For example, by attending this training programme, people will be more competent  
429 about how to live their life in their communities as well as more confident about how to save  
430 themselves and others when there is a significant sea level rise or cyclones.

431

### 432 **Provide accredited qualifications on resilience in health**

433 As the Pacific is constantly affected by climate change and natural disasters caused by  
434 natural hazards, vocational education in the region could come up with a common denominator  
435 between TVET, climate change and health which is to provide accredited qualifications on  
436 certificate levels 1 to 4 in Resilience (CCA & DRR). Significantly, this can be used by  
437 vocational education as part of their climate change regime to 2030 and beyond by creating more  
438 jobs that are secure and improving the conditions of employment that will lead to improvement  
439 in health adaptation and resilience. The EU PacTVET project can provide this competency-based  
440 education model to help the 15 P-ACP countries to meet not only education-related goals but to  
441 also address the shortages of skilled workers that are emerging to improve both health economics  
442 and resilience.

443

444 This is why the project made a significant partnership with the global leader in health  
445 such as WHO regional office in Suva, and regional health leader such as the Ministry of Health  
446 and Medical Services Department of Climate Change, School of Nursing and the School of  
447 Public Health at the Fiji National University in Fiji in developing these resilience and health  
448 certificates, to ensure that these sustainable goals will be met by 2020 and beyond. Most  
449 importantly, the consultant for the development of these resources were purely Pacific Islanders

450 people, who are well-versed with Pacific culture and heritage and health problems facing the  
451 people in the region.

452 The EU PacTVET project is the first to establish a professional association for resilience  
453 practitioners: The Pacific Regional Federation of Resilience Professionals (PRFRP) [23].

454

455 This Federation, along with relevant stakeholders like USP, should build capacity  
456 regionally to allow the implementation of the SDGs, UNFCCC and the Sendai Framework  
457 instruments through grassroots and up to management level. By investing in people’s knowledge  
458 and their will to provide safer and more secure environments for their families, friends and  
459 visitors alike, it is believed that this intervention may turn the tide for resilience in the Pacific  
460 and be able to change how people live and work, thus building more sustainable Pacific  
461 communities now and in the future. Clearly, by its very nature, “vocational” education is linked  
462 to employment. However, in small Pacific island communities, paid employment is not the norm,  
463 therefore, the Resilience qualifications work at the grassroots level by providing training for  
464 “productive activities” within the community which will improve resilience, livelihoods, health  
465 and well-being. One example of such community activities would be training to ensure the  
466 production of safe drinking water – solar water disinfection (SODIS).

467

468 SODIS is a process of using solar energy from the sun to destroy the pathogenic micro-  
469 organisms that cause water-borne disease so that the drinking water treatment can be available at  
470 a low-cost solution at the household level [43]. The project was implemented in South Tarawa,  
471 Kiribati by the Global Climate Change Alliance: Pacific Small Island States project. SODIS uses  
472 readily available resources i.e. sun, 1.5 litres plastic PET bottles and roofing iron to disinfect

473 water, thereby ensuring sustainability of the skills imparted. Communities in South Tarawa were  
474 trained in SODIS and awareness activities included the distribution of starter packs and  
475 educational games specifically designed for children. SODIS was launched in October 2014 and  
476 by February 2015 76% of households in the target communities were using SODIS. The  
477 communities reported:

- 478 • positive effects including decreases in diarrheal disease especially in children under 5  
479 years old;
- 480 • fewer days of school missed;
- 481 • decreased spending on kerosene for boiling water;
- 482 • better tasting and smelling water compared to boiling water;
- 483 • the health clinic servicing the communities also reported decreased incidences of  
484 diarrhoea and respiratory illness [43].

485 SODIS training is needed by most communities in the Pacific who have to deal with lack of safe  
486 drinking water on a daily basis.

487

488 This can be easily achieved by vocational education in the Pacific because resilience  
489 education is a route to better chances in life. Fundamentally, if people chose to pursue better  
490 chances in life, then it can be translated into better health outcomes because this has been proven  
491 in other areas of life in the Pacific where people have been dealing with cyclones and sea level  
492 rise. By training people in the region to be more climate and disaster resilience may not only help  
493 them develop innovative solutions to build resilience in health to climate change and disaster  
494 caused by natural hazards but also to be revolutionized in turning these threats or impacts into a  
495 multipath embedded opportunistic resilience [44, 45].

496

497 For example, as a management level, a person with a degree in economics in Tonga may  
498 know more about the Tongan economy than health, climate change and hazards for that matter.  
499 If the same person enrolled in the course on resilience and health, this person will be exposed to  
500 health, climate change and hazards education and will also be able to make an association to  
501 economics in order to achieve better livelihoods, health and well-being for his or her family.

502

503

504

505 **Vocational education is a stepping stone to regionalize and nationalize climate change and**  
506 **health at primary and secondary levels to develop a sustainable solution for the future**

507 If the Pacific is planning to regionalize and nationalize climate change at the vocational  
508 education level now and in the future, then this needs to be acknowledged and climate change  
509 and health needs to be considered in a different way to exert leadership and take forward global  
510 action on addressing climate and health in the region. The best way to do this in the vocational  
511 education sector is to use it as a platform as well for the primary and secondary schools to  
512 develop a sustainable solution for the Pacific community, thus helping to build resilient Pacific  
513 Islanders and communities by 2030 and beyond. From what is known in the region, people's  
514 health suffers because of the impacts of climate change on their health in where they live and  
515 work [14] and due to lack of support from the education sector. The end goal of the EU  
516 PacTVET project and its PRFRP – and its follow up – is to change this reality.

517

518           The task of the EU PacTVET programme is not only to identify and support the  
519 application of climate change and health interventions that will do the most to improve the  
520 climate change conditions that determine health for the people in the region, but also to help the  
521 vocational, primary and secondary education sector progress towards that ideal. These climate  
522 change and health adaptation strategies do not just impact on children or young people mortality.  
523 Rather they have a powerful impact on adult mortality as well, so powerful that a poor person at  
524 the age of 12 in Vanuatu or Tonga has far fewer years in front of him/her than a poor person of  
525 the same age in the United State of America (USA) with the same impacts of climate change on  
526 their health. In doing so, not only does the education sector change the impact cycle of climate  
527 change on health, but it will also help the people of the Pacific to improve their health adaptation  
528 strategies in their communities – to restore better health and well-being.

529  
530           As Queen Salote Tupou III of Tonga stated: “ ‘Oku ‘auha hoku kakai he masiva ‘ilo (the  
531 demise of my people is caused by lack of knowledge). This may have been meant for the people  
532 of Tonga, but this conceptualisation of knowledge is universal and as a result, it can be applied to  
533 other Pacific Islanders as well. The same advice was given by Hosea 4:6 in the Bible that “My  
534 people are destroyed for lack of knowledge. Because you have rejected knowledge, I also will  
535 reject you from being My priest. Since you have forgotten the law of your God, I also will forget  
536 your children” [46].

537  
538           Importantly, in the Pacific in terms of climate change, health and religion in the region.  
539 However, the EU PacTEVT project has responded to this call and will tackle the Pacific lack of  
540 knowledge on climate change and health using this new regime. This regime may not only

541 increase the adaptation space for wisdom, skill and knowledge-base for basic education on  
542 climate change and health Pacific-wide but will have impacts on other sectors as well  
543 (agriculture, coastal management, energy and infrastructure, fishery, forestry, tourism, water  
544 resources) since they are interrelated, thus helping vocational, primary and secondary education  
545 to develop more sustainable resilience solutions for the future.

546

## 547 **Conclusion**

548 Using vocational education to provide development solutions in the Pacific on health and  
549 climate change is new. As a result, there is an opportunity here for the EU PacTVET project to  
550 follow through and change this reality once and for all in order to model the degree to which the  
551 Pacific society delivers a good life to its citizenry. If the higher education sector already proved  
552 it to the world that their strategies worked, then this process should be completed by using the  
553 bottom-up approach so that the adaptation strategies process can benefit all levels of society (e.g.  
554 streamline climate change and health at primary, secondary and vocational education). In doing  
555 so, not only will it landscapes climate change in a way that has never done before, but it will  
556 create ownership of the climate change regime and benefit the adaptation space of the Pacific  
557 community at large.

558

559 There are three ways to achieve this goal. First, is to design a training programme that  
560 focuses on training experts in health adaptation through vocational education. This is the best  
561 solution that TVET education could provide for climate change and health regarding their  
562 participants as students. Second, after designing the training programme to focus on climate  
563 change and health, the next phase is to ensure that they get a job. Meaning the programme should

564 be able to provide accredited qualifications on resilience in health to work as climate change  
565 advisors or consultants inter alia in their own countries. This is very important for the people in  
566 the region because there are two-way benefits: health and economy. Thirdly, when the vocational  
567 education is manageable with its programme in situ, the last phase is to help regionalize and  
568 nationalize climate change and health at primary and secondary levels for the region to develop  
569 more sustainable resilience solutions for the future. Since the Pacific is the most vulnerable  
570 region in the world to be affected by climate change and disasters caused by natural hazards,  
571 therefore without any doubt, this is the way forward that should be engaged in order to change  
572 this reality and reverse this impact of climate change on health.

573 To ensure that this intervention is achievable for the Pacific, based on the result of the EU  
574 PacTVET project, this paper recommends the following policy proposals for the region:

- 575 1) to integrate climate change and health into the Pacific vocational education  
576 curriculum;
- 577 2) to integrate climate change and health into the primary and secondary schools  
578 curriculum in the Pacific.

579

## 580 **Acknowledgements**

581 This research was supported by the EU PacTEVT project from the Pacific Community  
582 (SPC), The University of the South Pacific, Suva, Fiji and the School of Humanities  
583 (Geography), at Bishop Grosseteste University, Lincoln, UK.

584

## 585 **References**



586

- 587 1. IPCC. Climate Change 2014: Impacts, Adaptation, and Vulnerability. Part B: Regional  
588 Aspects. Contribution of Working Group II to the Fifth Assessment Report of the  
589 Intergovernmental Panel on Climate Change. Barros VR, Field CB, Dokken DJ,  
590 Mastrandrea MD, Mach KJ, Bilir TE, et al., editors. Cambridge: Cambridge  
591 University Press; 2014. 688 p.
- 592 2. IPCC. Climate Change 2014: Impacts, Adaptation, and Vulnerability. Part A: Global  
593 and Sectoral Aspects. Contribution of Working Group II to the Fifth Assessment  
594 Report of the Intergovernmental Panel on Climate Change. Field CB, Barros VR,  
595 Dokken DJ, Mach KJ, Mastrandrea MD, Bilir TE, et al., editors. Cambridge:  
596 Cambridge University Press; 2014. 1132 p.
- 597 3. IPCC. Climate Change 2014: Mitigation of Climate Change. Contribution of Working  
598 Group III to the Fifth Assessment Report of the Intergovernmental Panel on Climate  
599 Change. Edenhofer O, Pichs-Madruga R, Sokona Y, Farahani E, Kadner S, Seyboth K,  
600 et al., editors. Cambridge: Cambridge University Press; 2014.
- 601 4. IPCC. Climate Change 2014: Synthesis Report. Contribution of Working Groups I, II  
602 and III to the Fifth Assessment Report of the Intergovernmental Panel on Climate  
603 Change. Pachauri RK, Meyer LA, editors. Geneva: IPCC; 2014. 151 p.
- 604 5. United Nations University, Institute for Environment and Human Security (UNU-  
605 EHS), Universität Bonn. World Risk Report 2013 - Focus: Health and Healthcare.  
606 Berlin, Germany: Bündnis Entwicklung Hilft; 2013.
- 607 6. United Nation University (Institute for Environment and Human Security). World risk  
608 report 2016: Focus (logistic and infrastructure). Tokyo, Japan: UNU; 2016.
- 609 7. Piao S, Ciais P, Huang Y, Shen Z, Peng S, Li J, et al. The impacts of climate change  
610 on water resources and agriculture in China. *Nature*. 2010;467(7311):43-51.
- 611 8. Brown LH. The effects of climate change on revenues to commercial agriculture and  
612 tourism enterprises in Namibia. York, UK: MSc Environmental Economics Thesis,  
613 University of York; 2009.
- 614 9. Sumaila UR, Cheung WWL, Lam VWY, Pauly D, Herrick S. Climate change impacts  
615 on the biophysics and economics of world fisheries. *Nature Clim Change*.  
616 2011;1(9):449-56.
- 617 10. Lam VWY, Cheung WWL, Reygondeau G, Sumaila UR. Projected change in global  
618 fisheries revenues under climate change. *Scientific Reports*. 2016;6:32607.
- 619 11. Bell J, Johnson J, Ganachaud A, Gehrke P, Hobday A, Hoegh-Guldberg O, et al.  
620 Vulnerability of Tropical Pacific Fisheries and Aquaculture to Climate Change:  
621 Summary for Pacific Island Countries and Territories. Noumea, New Caledonia:  
622 Secretariat of the Pacific Community; 2011.
- 623 12. EU PacTVET Project, SPC, USP. Regional certificate 4 in Resilience (Climate  
624 Change Adaptation and Disaster Risk Reduction/CCA & DRR). Suva, Fiji: EU  
625 PacTVET Project; 2016.

- 626 13. EU PacTVET Project, SPC, USP. Regional certificate 3 in Resilience (Climate  
627 Change Adaptation and Disaster Risk Reduction/CCA & DRR). Suva, Fiji: EU  
628 PacTVET Project; 2016.
- 629 14. WHO. Human health and climate change in Pacific Island countries. Geneva: World  
630 Health Organisation; 2015.
- 631 15. The Pacific Islands Regional Climate Assessment (PIRCA). Climate change and  
632 Pacific Islands: Indicators and impacts. Washington: Island Press; 2012.
- 633 16. Havea PH, Hemstock SL, Jacot de Combes H. “God and Tonga Are My  
634 Inheritance!”—Climate Change Impact on Perceived Spirituality, Adaptation and  
635 Lessons Learnt from Kanokupolu, ‘Aha, Tukumonga, Popua and Manuka in  
636 Tongatapu, Tonga. In: Leal Filho W, editor. Climate Change Impacts and Adaptation  
637 Strategies for Coastal Communities - Climate Change Management. Cham: Springer;  
638 2018.
- 639 17. Australian Bureau of Meteorology and Commonwealth Scientific and Industrial  
640 Research Organisation (CSIRO). Climate variability, extremes and change in the  
641 western tropical Pacific: New science and updated country reports (Volume 2).  
642 Melbourne, Australia: Pacific-Australia Climate Change Science and Adaptation  
643 Planning Program Technical Report, Australian Bureau of Meteorology and  
644 Commonwealth Scientific and Industrial Research Organisation; 2014.
- 645 18. Fox L, Walsh M. Cyclone Winston: Fiji death toll reaches 42 with reports entire  
646 villages wiped out on remote islands Australia: ABC News; 2016 [cited 2017 Apr 28].  
647 Available from: [http://www.abc.net.au/news/2016-02-24/cyclone-winston-entire-](http://www.abc.net.au/news/2016-02-24/cyclone-winston-entire-villages-wiped-out-on-fijis-koro-island/7195842)  
648 [villages-wiped-out-on-fijis-koro-island/7195842](http://www.abc.net.au/news/2016-02-24/cyclone-winston-entire-villages-wiped-out-on-fijis-koro-island/7195842).
- 649 19. Reardon GF, Oliver J. The impact of cyclone Isaac on buildings of Tonga. *Journal of*  
650 *Wind Engineering and Industrial Aerodynamics*. 1983;14(1-3):67-78.
- 651 20. Magee AD, Verdon-Kidd DC, Kiem AS, Royle SA. Tropical cyclone perceptions,  
652 impacts and adaptation in the Southwest Pacific: An urban perspective from Fiji,  
653 Vanuatu and Tonga. *Nat Hazards Earth Syst Sci*. 2016;(16):1091–105.
- 654 21. Tonga Meteorological Service. List of tropical cyclones that has affected at least a part  
655 of Tonga from 1960 to present. Nuku'alofa: Government of Tonga; 2014.
- 656 22. Food and Agriculture Organisation (FAO), Ministry of Agriculture Food Forests and  
657 Fisheries (MAFFF). Cyclone Ian in Ha’apai: Rapid damage assessment to the  
658 agriculture and fisheries sectors report. Tonga: Ministry of Agriculture and Food,  
659 Forests and Fisheries; 2014.
- 660 23. EU PacTVET Project. The Pacific Regional Federation of Resilience Professionals  
661 (PRFRP). A professional organization to build capacity in the climate change and  
662 disaster risk management sectors in 15 small island developing states in the Pacific -  
663 Submission to the Paris Committee on Capacity-Building. Fiji: SPC; 2017.
- 664 24. World Health Organisation (WHO). The Fiji Islands Health System Review.  
665 Switzerland: WHO; 2011.

- 666 25. Ministry of Health and Medical Services (MoHMS). Climate change and health  
667 strategic action plan 2016-2020. Suva, Fiji: MoHMS; 2016.
- 668 26. Hemstock SL, Buliruarua L, Chan E, Chan G, Jacot de Combes H, Davey P, et al.  
669 Accredited qualifications for capacity development in disaster risk reduction and  
670 climate change adaptation. *Australasian Journal of Disaster and Trauma Studies*.  
671 2016;20(1):15-34.
- 672 27. Bartram J. A review of Technical and Vocational Education and Training (TVET)  
673 Policy and Planning in the Pacific Islands. Fiji: Pacific Association of Technical and  
674 Vocational Education and Training; 2004.
- 675 28. UNDP. Sustainable Development Goals (SDGs). USA: UNDP; 2015.
- 676 29. Creswell JW, Plano Clark VL. *Designing and Conducting Mixed Methods Research*.  
677 2nd ed. United State of America: SAGE; 2011.
- 678 30. Creswell JW. *Research Design*. Los Angeles: SAGE; 2014.
- 679 31. Creswell JW. *Qualitative inquiry and research design: Choosing among five*  
680 *approaches*. United State of America: SAGE; 2013.
- 681 32. UNESCAP. E-Government for women's empowerment in Asia and the Pacific.  
682 Bangkok, Thailand: Economic and Social Commission for Asia and the Pacific; 2016.
- 683 33. Pacific Community (SPC). *Pacific platform for action on gender equality and women's*  
684 *human rights 2018–2030*. Suva, Fiji: SPC; 2017.
- 685 34. Government of Fiji. *5-Year & 20-Year national development plan - transforming Fiji*.  
686 Suva, Fiji: Ministry of Economy; 2017.
- 687 35. Government of Tonga. *Tonga strategic development framework 2015-2025 - A more*  
688 *progressive Tonga: Enhancing our inheritance*. Tonga: Ministry of Finance and  
689 National Planning; 2015.
- 690 36. Regmi S. Gender and Health Adaptation Measures to Climate Change in the Pacific:  
691 A Case Study of Papua New Guinea. In: W. LF, editor. *Handbook of Climate Change*  
692 *Adaptation*. Berlin, Heidelberg: Springer; 2015.
- 693 37. McIver L, Kim R, Woodward A, Hales S, Spickett J, Katscherian D, et al. Health  
694 impacts of climate change in Pacific island countries: A regional assessment of  
695 vulnerabilities and adaptation priorities. *Environ Health Perspect*. 2016;124(11):1707-  
696 14.
- 697 38. Spickett JT, Katscherian D, McIver L. Health impacts of climate change in Vanuatu:  
698 an assessment and adaptation action plan. *Glob J Health Sci*. 2013;5(3):42-53. doi:  
699 10.5539/gjhs.v5n3p42.
- 700 39. McIver LJ, Naicker J, Hales S, Singh S, Dawainavesi A. Climate change and health in  
701 Fiji: environmental epidemiology of infectious diseases and potential for climate-  
702 based early warning systems. *Fiji Journal of Public Health (FJPH)*. 2012;1(1):7-13.  
703 doi: 10.1038/gim.2013.195.

- 704 40. McIver L, Woodward A, Davies S, Tibwe T, Iddings S. Assessment of the health  
705 impacts of climate change in Kiribati. *Int J Environ Res Public Health*.  
706 2014;11(5):5224-40.
- 707 41. Pacific Community (SPC), Secretariat of the Pacific Regional Environment  
708 Programme (SPREP), Pacific Islands Forum Secretariat (PIFS), United Nations  
709 Development Programme (UNDP), United Nations Office for Disaster Risk Reduction  
710 (UNISDR), University of the South Pacific (USP). Framework for resilience  
711 development in the Pacific: An integrated approach to address climate change and  
712 disaster risk management (FRDP) 2017-2030. Suva, Fiji: The Pacific Community,  
713 Geoscience Division; 2016.
- 714 42. Farmer P. Pathologies of power: Health, human rights, and the new war on the poor.  
715 USA: University of California Press; 2005.
- 716 43. Pacific Community (SPC). Climate change adaptation in Kiribati - Solar Disinfection  
717 (SODIS) in Kiribati. Suva, Fiji: SPC; 2014.
- 718 44. Borquez R, Aldunce P, Adler C. Resilience to climate change: from theory to practice  
719 through co-production of knowledge in Chile. *Sustainability Science*. 2017;12(1):163-  
720 76. doi: 10.1007/s11625-016-0400-6.
- 721 45. Oliveira RR, Marcon DS, Bays LR, Neves MC, Gaspary LP, Medhi D, et al.  
722 Opportunistic resilience embedding (ORE): Toward cost-efficient resilient virtual  
723 networks. *Computer Networks*. 2015;89:59-77. doi:  
724 <https://doi.org/10.1016/j.comnet.2015.07.010>.
- 725 46. The Bible Society in Australia. Good news bible: Australian edition. Canberra: The  
726 Bible Society in Australia; 1988.
- 727

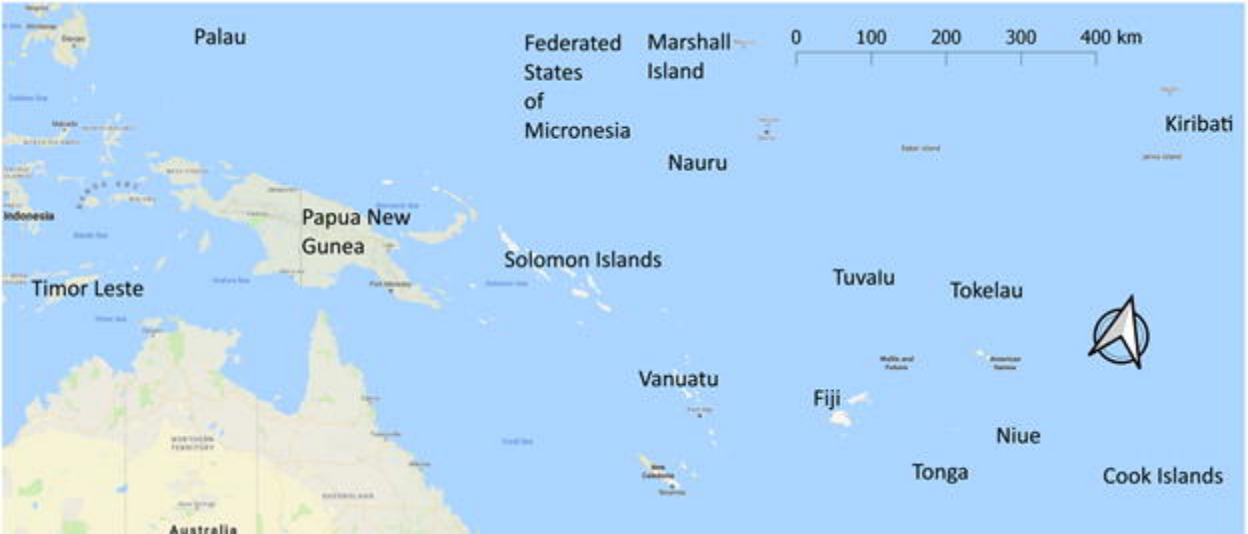

## LANDSCAPE CLIMATE CHANGE AND HEALTH

- 1) Educational Quality Assurance and Accreditation of Developed Qualifications
- 2) Climate Change and Health Qualifications – Health Resilience Certificate 1-4

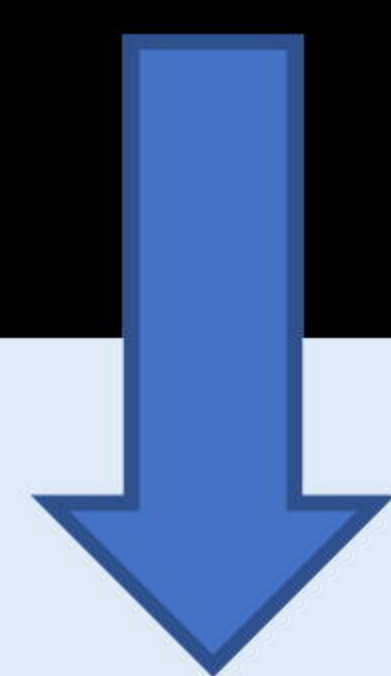

### REGIME

- Curriculum
- Course coordinator
- Training programme on resilience and health
- Recruitment of participants to take the course

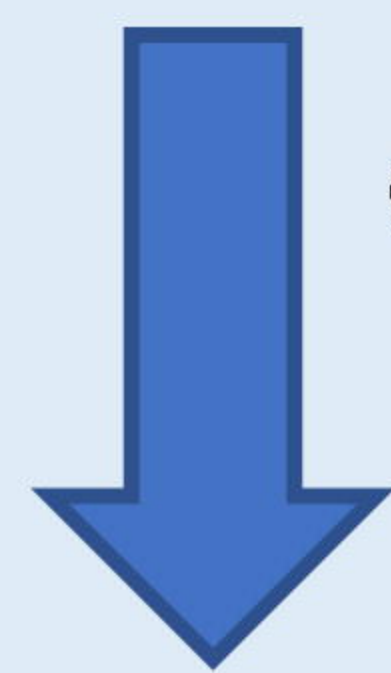

Output

### QUALIFICATION

- Accreditation Certificate Levels 1-4

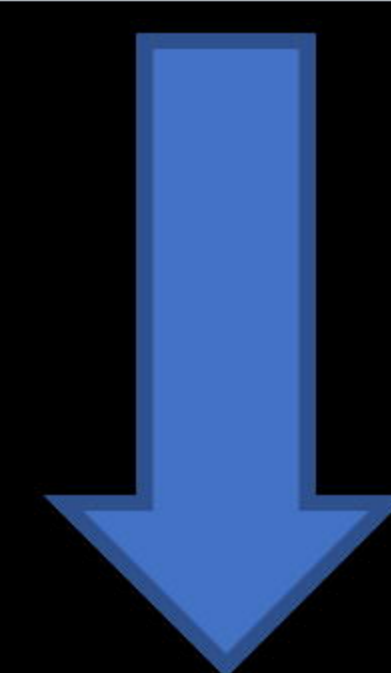

## HEALTH RESILIENCE AND ADAPTATION SPACE

- Resilience and Health Climate Change Officer
- Community Liaison
- Project Officer
- National Disaster Management Officer
- Climate Change Planning & Development Officer

## EU PACTVET PROJECT

## TVET INSTITUTION

- Verification of institution delivery (EQAP/FHEC) to ensure that institutions are able to effectively deliver the qualifications

EQAP – Educational Quality & Assessment Programme  
FHEC – Fiji Higher Education Commission

## PACIFIC COMMUNITIES

- Cook Islands, Federated States of Micronesia (FSM), Fiji, Kiribati, Nauru, Niue, Palau, Papua New Guinea (PNG), Republic of the Marshall Islands (RMI), Samoa, Solomon Islands, Timor-Leste, Tonga, Tuvalu and Vanuatu

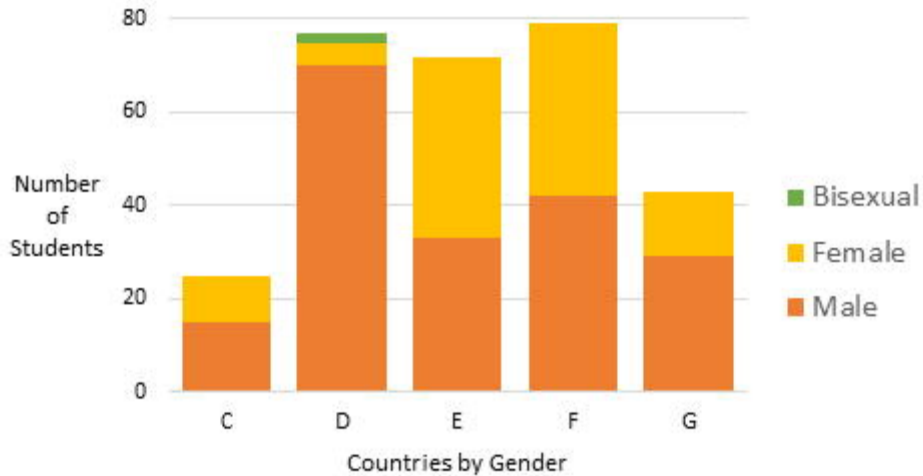

**Health**

33.3(8.32)

36%

40%

24%

**Mean (SD)**

**1st preference**

**2nd preference**

**3rd preference**

**Percent**

100

75

50

25

0
